# Supplementary figures and images for: Approach to DIEP Flap Pedicle Dissection via a Midline Fascial Incision
Source: PubMed Central journal article supplement — Plast Reconstr Surg Glob Open. 2024 Dec 19;12(12):e6392. doi: 10.1097/GOX.0000000000006392 (PMC11658724; doi:10.1097/gox.0000000000006392), 2024-12-19

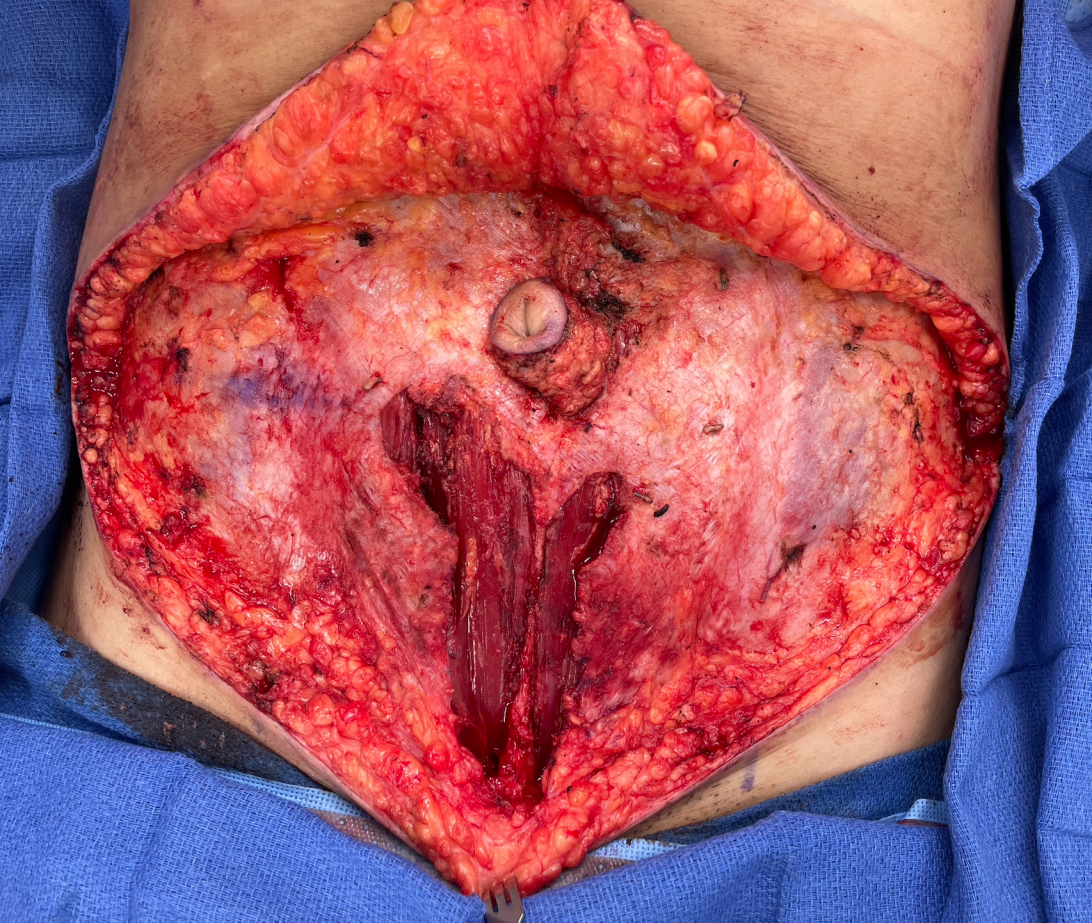

Supplement: gox-12-e6392-s001.pdf [file gox-12-e6392-s001.pdf]

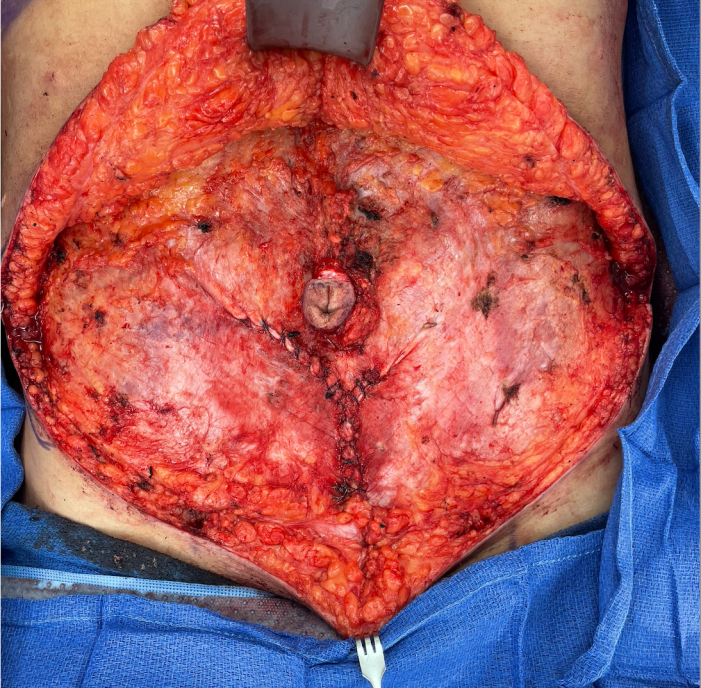

Supplement: gox-12-e6392-s002.pdf [file gox-12-e6392-s002.pdf]
